# Supplementary material
Source: PubMed Central journal article supplement (PMC2772994)
Supplement: NIHMS152798-supplement-1_si_001.pdf [file NIHMS152798-supplement-1_si_001.pdf]

Supporting Information

## Fluorinated Xerogel-Derived Ultramicroelectrodes for Amperometric Nitric Oxide Sensing

*Jae Ho Shin, Benjamin J. Privett, Justin M. Kita, R. Mark Wightman, and Mark H. Schoenfish\**

Contribution from the Department of Chemistry, University of North Carolina at Chapel Hill,  
Chapel Hill, North Carolina 27599

\* To whom correspondence should be addressed. E-mail: schoenfish@unc.edu

### **1. Electrooxidation process of nitric oxide on a platinum working electrode.**

The electrochemical oxidation of NO on a polycrystalline platinum electrode proceeds via the following

reactions.<sup>S1-S3</sup> In the first step (Eq. S1) an electron is transferred from NO to the electrode, generating an oxidation current. Since nitrosonium ion ( $\text{NO}^+$ ) is a relatively strong Lewis acid, it is converted to nitrite ( $\text{NO}_2^-$ ) in the presence of hydroxide ( $\text{OH}^-$ ) (Eq. S2).

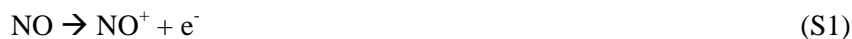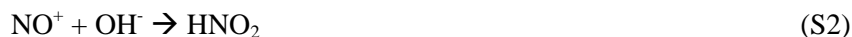

Ultimately  $\text{NO}_2^-$  is further oxidized to nitrate ( $\text{NO}_3^-$ ), the final product of NO's electrochemical oxidation, resulting in the additional transfer of two electrons to the platinum electrode:

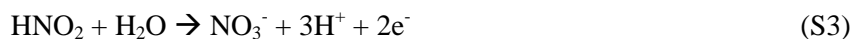

## 2. Calculation of the concentration for a standard NO solution (adapted from ref. S4).

The molarity of NO ( $C_{\text{NO}}$ ,  $\text{mol}\cdot\text{L}^{-1}$ ) in phosphate-buffered saline (PBS; containing 3.9 mM  $\text{NaH}_2\text{PO}_4$ , 6.1 mM  $\text{Na}_2\text{HPO}_4$ , 2.7 mM KCl, and 138 mM NaCl) can be calculated from Henry's law:

$$C_{\text{NO}} = P_{\text{NO}}S_{\text{NO}} \quad (\text{S4})$$

where  $P_{\text{NO}}$  is the pressure of NO (mmHg), and  $S_{\text{NO}}$  is the solubility of NO in water ( $\text{cm}^3$ ). Alternatively,  $C_{\text{NO}}$  and  $S_{\text{NO}}$  in water may be calculated as  $C_{\text{NO}}$  and  $S_{\text{NO}}$  in saline or PBS. The pressure of NO ( $P_{\text{NO}}$ ) may be expressed as follows.

$$P_{\text{NO}} = (P_{\text{tot}} - P_{\text{w}})(G_{\text{NO}})10^{-6} \quad (\text{S5})$$

where  $P_{\text{tot}}$  and  $P_{\text{w}}$  are the total pressure (760 mmHg) of the gas mixture and the partial pressure of water vapor (23.8 mmHg)<sup>S5</sup> at 25 °C, respectively. In addition,  $G_{\text{NO}}$  is the NO concentration obtained from a gas cylinder (ppm). For our studies,  $S_{\text{NO}}$  at 25 °C is  $0.0432 \text{ cm}^3$ .<sup>S6</sup> Finally, converting the units of pressure from mmHg to  $\text{mol}\cdot\text{L}^{-1}$  yields the following expression:

$$C_{\text{NO}} = (760 - 23.8) \frac{133.322 \times 10^{-3}}{8.314(273.15 + 25)} (G_{\text{NO}})10^{-6}(0.0432) \quad (\text{S6})$$

Therefore, when PBS is purged with 24.1 ppm of NO gas ( $G_{\text{NO}}$ ),  $C_{\text{NO}}$  is about 41 nM.

**Table S1.** Electrochemical characteristics of fluorinated xerogel-derived NO sensors as a function of xerogel composition<sup>a</sup>

| Xerogel composition <sup>b,c</sup>         | Permeability, $P_i^e$ |                    | Permselectivity, $\alpha_{NO,NO_2^-}$ | Selectivity, <sup>d</sup><br>$\log K_{NO,NO_2^-}^{amp}$ |
|--------------------------------------------|-----------------------|--------------------|---------------------------------------|---------------------------------------------------------|
|                                            | $i = NO$              | $i = NO_2^-$       |                                       |                                                         |
| Bare Pt (blank)                            |                       |                    |                                       | $-1.51 \pm 0.09$                                        |
| MTMOS (control)                            | $0.52 \pm 0.05$       | $0.32 \pm 0.09$    | $1.6 \pm 0.5$                         | $-1.74 \pm 0.16$                                        |
| BTMOS (control)                            | $0.83 \pm 0.08$       | $0.83 \pm 0.12$    | $1.0 \pm 0.2$                         | $-1.60 \pm 0.03$                                        |
| 20% 3FTMS/MTMOS                            | $0.77 \pm 0.11$       | $0.19 \pm 0.04$    | $4.1 \pm 1.0$                         | $-2.00 \pm 0.20$                                        |
| 20% 9FTMS/MTMOS                            | $0.20 \pm 0.09$       | $0.061 \pm 0.009$  | $3.3 \pm 1.6$                         | $-1.90 \pm 0.10$                                        |
| 20% 13FTMS/MTMOS                           | $0.51 \pm 0.08$       | $0.053 \pm 0.007$  | $10 \pm 2$                            | $-2.22 \pm 0.11$                                        |
| 20% 17FTMS/MTMOS                           | $0.75 \pm 0.06$       | $0.0091 \pm 0.001$ | $83 \pm 11$                           | $-3.21 \pm 0.15$                                        |
| 20% 17FTMS/MTMOS/HCl                       | $0.72 \pm 0.09$       | $<0.0001$          | $7200 \pm 900$                        | $-5.74 \pm 0.14$                                        |
| 20% 17FTMS/MTMOS/NaOH                      | $0.13 \pm 0.02$       | $<0.0001$          | $1300 \pm 200$                        | $-4.83 \pm 0.09$                                        |
| 10% 17FTMS/MTMOS/HCl                       | $0.92 \pm 0.05$       | $0.047 \pm 0.009$  | $20 \pm 4$                            | $-3.11 \pm 0.21$                                        |
| 30% 17FTMS/MTMOS/HCl                       | $0.33 \pm 0.03$       | $<0.0001$          | $3300 \pm 300$                        | $-5.10 \pm 0.14$                                        |
| 40% 17FTMS/MTMOS/HCl                       | $0.11 \pm 0.05$       | $<0.0001$          | $1100 \pm 500$                        | $-4.57 \pm 0.20$                                        |
| 20% 17FTMS/BTMOS/HCl                       | $0.22 \pm 0.07$       | $<0.0001$          | $2200 \pm 700$                        | $-4.89 \pm 0.17$                                        |
| 20% AEMP3/MTMOS/Nafion (NO) <sup>e,f</sup> | $0.10 \pm 0.03$       | $<0.0001$          | $1000 \pm 300$                        | $-5.79 \pm 0.08$                                        |

<sup>a</sup>The values were determined at 10  $\mu$ M of NO and 100  $\mu$ M of  $NO_2^-$  in deoxygenated PBS (0.01 M, pH 7.4), respectively. Data are represented as means  $\pm$  SD ( $n = 3$  or 5). <sup>b</sup>MTMOS, methyltrimethoxysilane; BTMOS, isobutyltrimethoxysilane; 3FTMS, (3,3,3-trifluoropropyl)trimethoxysilane; 9FTMS, nonafluorohexyltrimethoxysilane; 13FTMS, (tridecafluoro-1,1,2,2-tetrahydrooctyl)trimethoxysilane; 17FTMS, (heptadecafluoro-1,1,2,2-tetrahydrodecyl)trimethoxysilane; AEMP3, (aminoethylaminomethyl)phenethyltrimethoxysilane. <sup>c</sup>Xerogel compositions used: 45–75  $\mu$ L of MTMOS or BTMOS, 0–30  $\mu$ L of fluoroalkoxysilane (corresponding to 0–40%, balance MTMOS or BTMOS), 300  $\mu$ L of ethanol, and 80  $\mu$ L of water with or without 5  $\mu$ L of 0.5 M HCl or 0.5 M NaOH as catalysts. All xerogel coatings were dried under ambient conditions for 24 h except the 17FTMS/BTMOS xerogel, which was cured at 80  $^{\circ}$ C for 24 h. <sup>d</sup>To determine NO selectivity over  $NO_2^-$ , the separate solution method was employed from Ref S7. <sup>e</sup>The previously-optimized composition of amine-modified xerogel coatings for a NO-permselective membrane from Ref S8. <sup>f</sup>The amine-modified xerogel membrane consists of 40  $\mu$ L of MTMOS, 10  $\mu$ L of AEMP3 (20%, balance MTMOS), 10  $\mu$ L of Nafion (17% of 50  $\mu$ L of total silane), 200  $\mu$ L of ethanol, and 100  $\mu$ L of water. After curing for 24 h under ambient conditions, the xerogel/Nafion-modified electrodes were then charged at 5 atm NO for 10 min.

**Table S2.**  $^{29}\text{Si}$  chemical shifts ( $\delta_{\text{Si}}$  in ppm from tetramethylsilane), relative intensities of  $T^n$  structures, and degrees of condensation (%DC) of 20% 17FTMS/MTMOS-derived xerogel membranes synthesized under different catalytic conditions<sup>a,b</sup>

| Catalytic condition      | Si structure (int%) |                    |                    | %DC <sup>c</sup> |
|--------------------------|---------------------|--------------------|--------------------|------------------|
|                          | $T^1$<br>(-44 ppm)  | $T^2$<br>(-53 ppm) | $T^3$<br>(-62 ppm) |                  |
| control <sup>d</sup>     | $5.2 \pm 1.5$       | $54.8 \pm 0.5$     | $40.0 \pm 1.6$     | $78.3 \pm 1.7$   |
| 6.5 mM HCl <sup>e</sup>  | $2.2 \pm 0.6$       | $36.3 \pm 1.7$     | $61.5 \pm 1.8$     | $86.4 \pm 2.1$   |
| 6.5 mM NaOH <sup>e</sup> | $3.7 \pm 0.8$       | $22.1 \pm 0.9$     | $74.2 \pm 2.3$     | $90.2 \pm 2.4$   |

<sup>a</sup>The values were obtained by deconvolution of  $^{29}\text{Si}$  CP/MAS NMR spectra. The peak intensity distributions were fitted to Gaussian functions, in terms of  $T^n$  where  $n = 1, 2,$  and  $3$  corresponding to the number of siloxane bridges bound to the silicon atom of interest. Data are represented as means  $\pm$  SD ( $n = 2$  or  $3$ ). <sup>b</sup>Xerogel composition used: 60  $\mu\text{L}$  of MTMOS, 15  $\mu\text{L}$  of 17FTMS (20%, balance MTMOS), 300  $\mu\text{L}$  of ethanol, and 80  $\mu\text{L}$  of water. All fluorinated xerogel coatings were dried under ambient conditions for 24 h. <sup>c</sup>The degree of condensation (%DC) was calculated from the relative intensities of  $T^n$  species. <sup>d</sup>Composition without a catalyst. <sup>e</sup>The addition of 5  $\mu\text{L}$  of 0.5 M HCl or 0.5 M NaOH in the above xerogel composition, respectively.

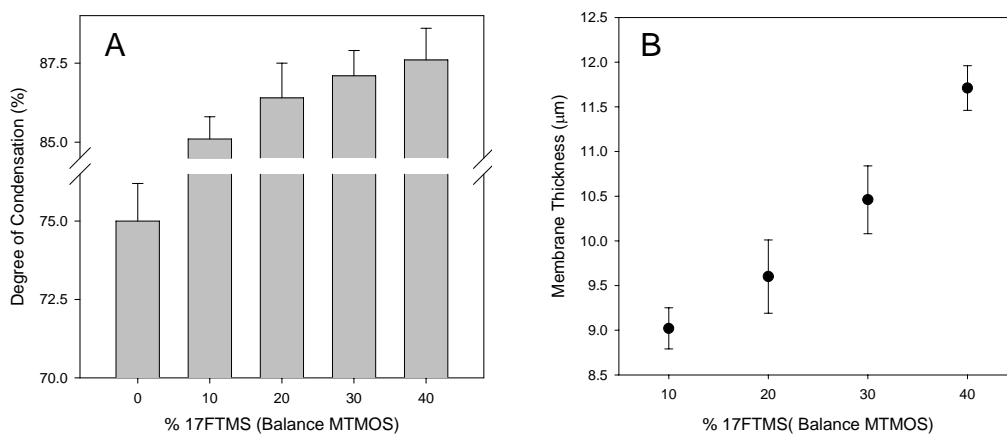

**Figure S1.** (A) Degree of condensation (%DC) and (B) thickness of the xerogel membrane as a function of the concentration of 17FTMS (balance MTMOS). All xerogels were synthesized under the acid-catalyzed conditions (6.5 mM HCl). The sol solution was deposited onto the Pt macroelectrodes ( $0.04 \mu\text{L}\cdot\text{mm}^{-2}$ ) and allowed to cure for 24 h under ambient conditions. Data are represented as means  $\pm$  SD ( $n = 2$  or  $3$  for graph (A) and  $n = 9$  for graph (B), respectively).

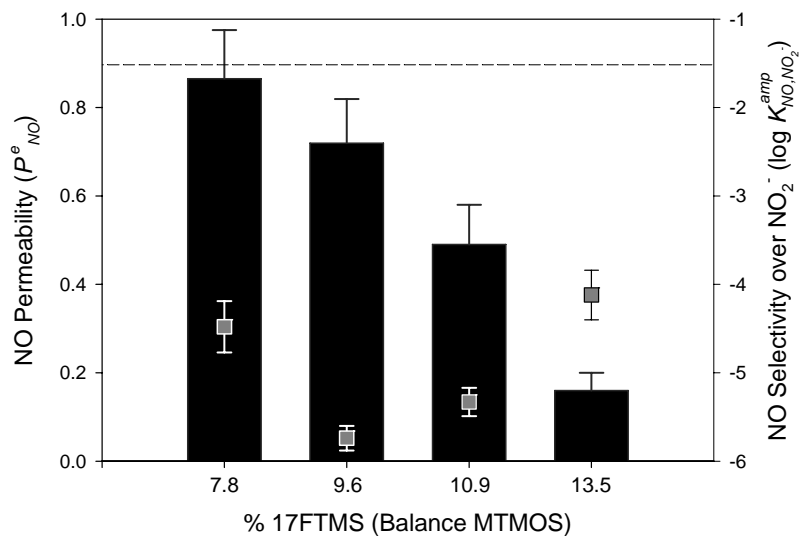

**Figure S2.** NO permeability (bar graphs, left axis) and selectivity over nitrite (scatter plots, right axis) as a function of the membrane thickness of 20% 17FTMS/MTMOS synthesized under the acid-catalyzed conditions (6.5 mM HCl). The dashed line indicates NO selectivity of the bare Pt electrode over nitrite. Data are represented as means  $\pm$  SD ( $n = 3$ ).

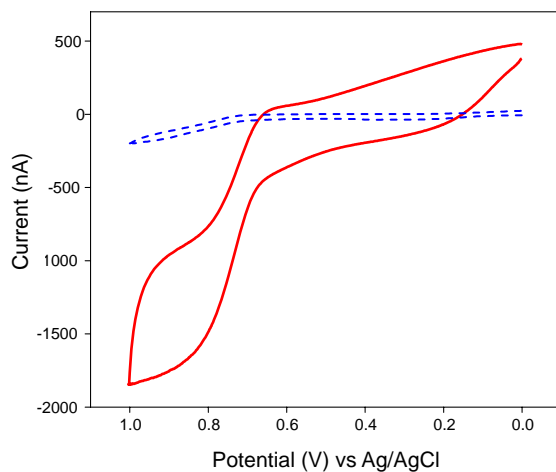

**Figure S3.** Cyclic voltammograms of the non-platinized (dashed blue) and platinized (solid red) Pt/W ultramicroelectrodes for 30  $\mu$ M of NO in deoxygenated PBS (0.01 M, pH 7.4) at a scan rate of 100  $mV \cdot s^{-1}$  vs Ag/AgCl.

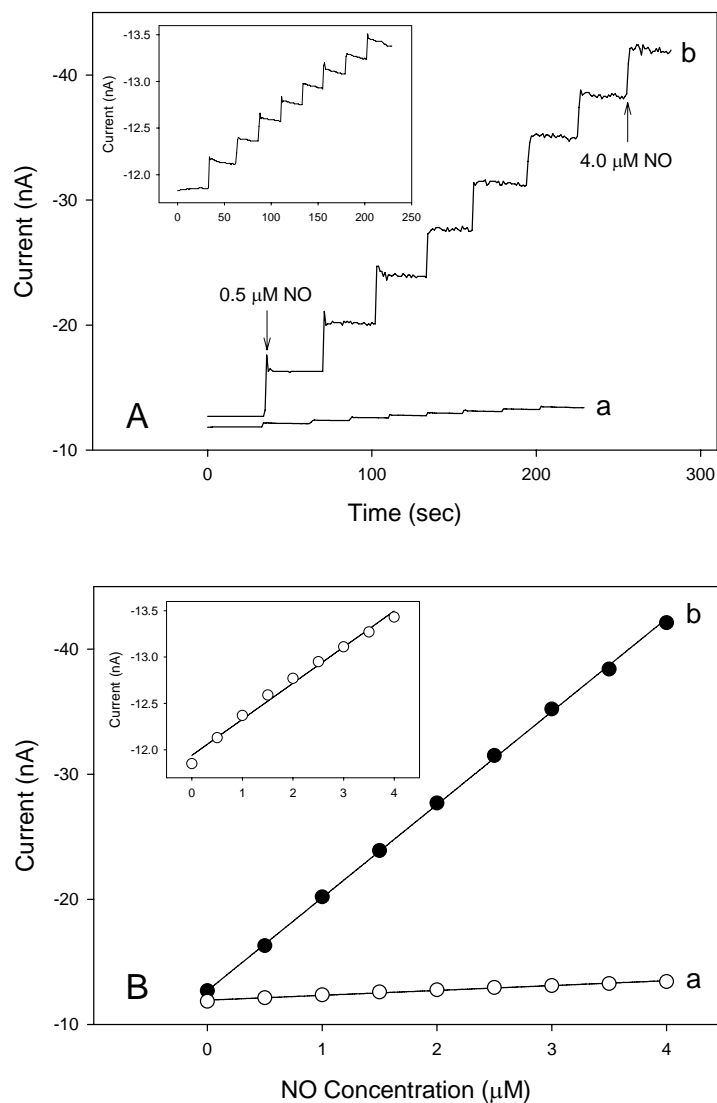

**Figure S4.** (A) Dynamic response and (B) calibration curves of the non-platinized (a) and platinized (b) Pt/W ultramicroelectrodes in deoxygenated PBS (0.01 M, pH 7.4). Currents were recorded at an applied potential of +0.7 and +0.8 V vs Ag/AgCl for the platinized and non-platinized electrodes, respectively. Insets represent the expansions of the dynamic response and calibration curves for the non-platinized electrode. The response sensitivity to NO was 0.38 ( $R^2 = 0.9948$ ) and 7.38 ( $R^2 = 0.9998$ ) nA· $\mu\text{M}^{-1}$  for the non-platinized and platinized Pt/W ultramicroelectrodes, respectively.

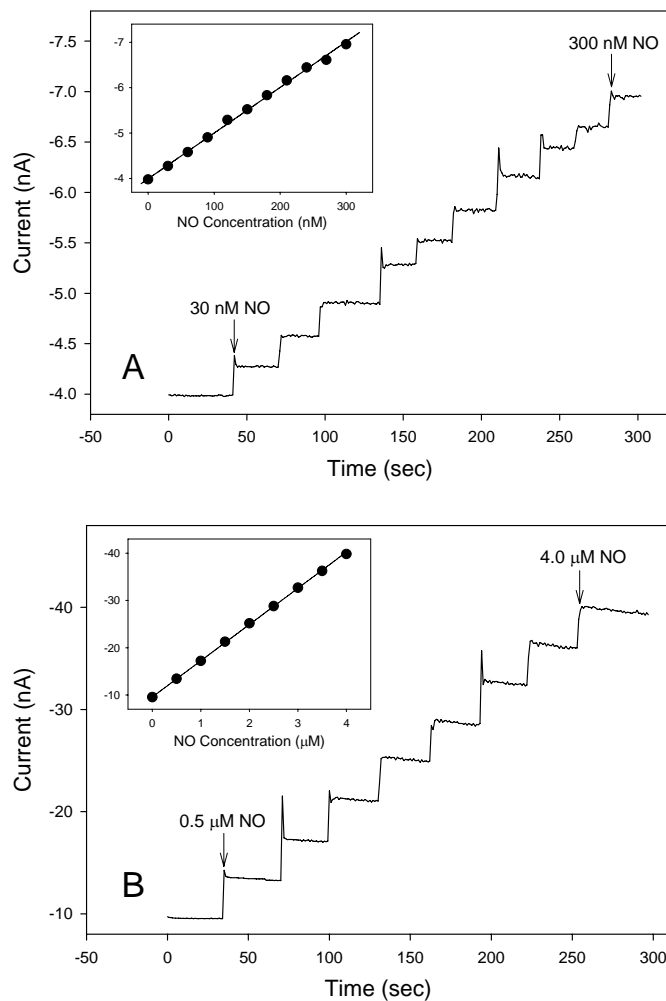

**Figure S5.** Dynamic response and calibration curves (insets) of the 20% 17FTMS/MTMOS-modified NO-selective ultramicroelectrode in the extended NO concentrations: (A) sub-micromolar and (B) micromolar levels of NO. The response sensitivity to NO was  $9.96 \text{ pA}\cdot\text{nM}^{-1}$  ( $R^2 = 0.9987$ ) in the range from 30 to 300 nM NO and  $7.60 \text{ nA}\cdot\mu\text{M}^{-1}$  ( $R^2 = 0.9999$ ) from 0.5 to 4.0  $\mu\text{M}$  NO, respectively.

## SI REFERENCES

- S1. Lee, Y.; Oh, B. K.; Meyerhoff, M. E. *Anal. Chem.* **2004**, *76*, 536-544.
- S2. Bedioui, F.; Trevin, S.; Devynck, J. *Electroanalysis* **1996**, *8*, 1085-1091.
- S3. de Vooy, A. C. A.; Beltramo, G. L.; van Riet, B.; van Veen, J. A. R.; Koper, M. T. M. *Electrochim. Acta* **2004**, *49*, 1307-1314.
- S4. Kitamura, Y.; Uzawa, T.; Oka, K.; Komai, Y.; Ogawa, H.; Takizawa, N.; Kobayashi, H.; Tanishita, K. *Anal. Chem.* **2000**, *72*, 2957-2962.
- S5. Dean, J. A. *Lange's Handbook of Chemistry*, 15th ed.; McGraw-Hill: New York, 1999; pp 5.28.
- S6. Dean, J. A. *Lange's Handbook of Chemistry*, 15th ed.; McGraw-Hill: New York, 1999; pp 5.6-5.7.
- S7. Stefan, R.-I.; van Staden, J. F.; Aboul-Enein, H. Y. *Electrochemical Sensors in Bioanalysis*; Marcel Dekker: New York, 2001.
- S8. Shin, J. H.; Weinman, S. W.; Schoenfish, M. H. *Anal. Chem.* **2005**, *77*, 3494-3501.
